# Supplementary material for: A novel β-loop scaffold of phage-displayed peptides for highly specific affinities
Source: Royal Society of Chemistry journal article supplement (doi:10.1039/c1mb05085k), 2011-06-08
Supplement: c1mb05085k.pdf [file c1mb05085k.pdf]

## Supplementary Material

### **A Novel $\beta$ -loop Scaffold of Phage-Displayed Peptides for Highly Specific Affinities**

Toshiki Sawada,<sup>a,b</sup> Kojiro Ishiguro,<sup>a</sup> Tsuyoshi Takahashi,<sup>a</sup> and Hisakazu Mihara\*<sup>a</sup>

<sup>a</sup> *Department of Bioengineering, Tokyo Institute of Technology  
4259-B40 Nagatsuta-cho, Midori-ku, Yokohama, Japan  
E-mail: hmihara@bio.titech.ac.jp*

<sup>b</sup> *Present address: Komaba Open Laboratory, The University of Tokyo  
4-6-1 Komaba, Meguro-ku, Tokyo, Japan*

## 1. Amino acids used in the constructed library

Percent appearances of amino acids used in the library were compared with that of calculated by the used codon (NNK).

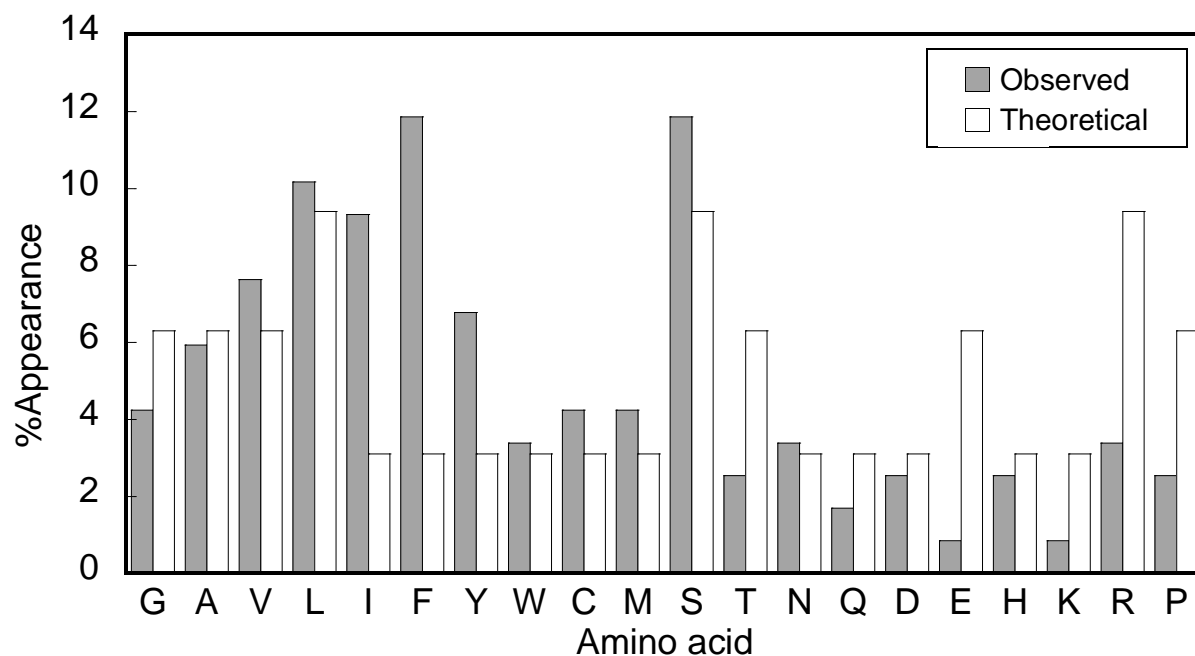

**Figure S1.** Percent appearances of amino acids in the peptide library. Gray and white bars represent observed and theoretical percentages of amino acids. The theoretical percentage was calculated by the used codon (NNK).

## 2. Amino acid sequences of phage clones and those affinities

**Table S1.** Amino acid sequences of phage-displayed peptides.

| clone | sequence | clone | sequence |
|-------|----------|-------|----------|
| c4-01 | CFCVW    | c5-01 | AFLV     |
| c4-06 | STWLF    | c5-02 | EGWLM    |
| c4-07 | SCCGF    | c5-03 | RGVFR    |
| c4-08 | DLVDA    | c5-04 | RWYRI    |
| c4-09 | PYLF     | c5-05 | IFCYS    |
| c4-10 | GVSFL    | c5-06 | CYFLC    |
| c4-11 | PLRGD    | c5-07 | SLHFN    |
| c4-12 | CQLD     | c5-08 | FLGCT    |
| c4-13 | SWFQ     | c5-09 | FLGHR    |
|       |          | c5-10 | VLDLR    |
|       |          | c5-11 | SRVAA    |
|       |          | c5-12 | PLRFL    |
|       |          | c5-13 | RGDS     |

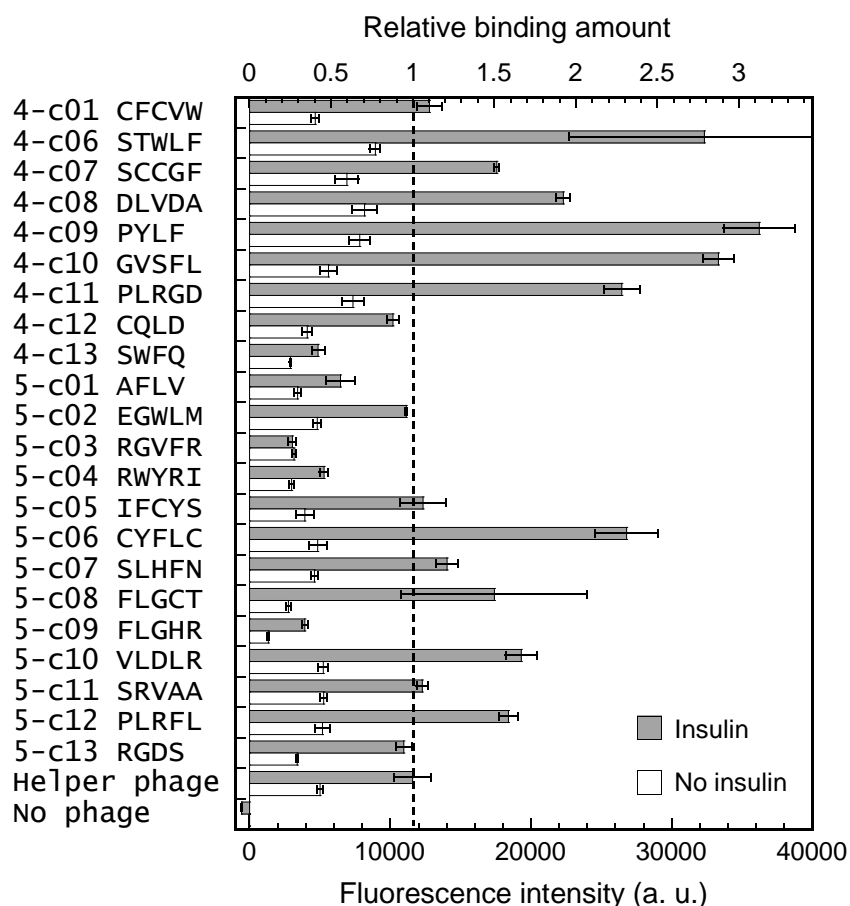

**Figure S2.** The binding amounts of the phage clones. The gray and white bars indicate the amounts against insulin and microtiter plate, respectively. For all samples  $n = 3$ . Error bars represent the standard deviation.

### 3. A binding constant of the peptide against insulin-like growth factor 1

The dependence of p5-6 concentrations against binding amounts are shown in Figure S3. Assuming a Langmuirian adsorption, the plots were fitted to the equation:

$$\frac{[peptide]}{RA} = \frac{1}{RA_{max}} [peptide] + \frac{1}{RA_{max} K_a}$$

where  $RA$  is the relative amount,  $RA_{max}$  is the maximum  $RA$ , and  $K_a$  is the binding constant. The fitted curves were shown in Figure S3.

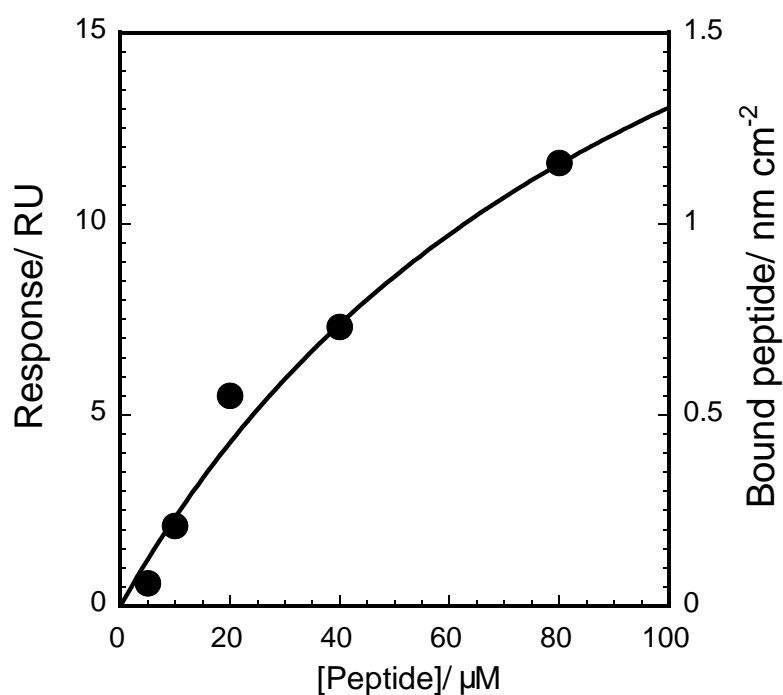

**Figure S3.** The dependence of p5-6 concentrations against the binding amounts.
